# Supplementary material
Source: Springer Nature journal article supplement (https://www.springermedizin.de/resource/supplementary/13012_2006_54_MOESM3_ESM.pdf/9629146)
Supplement: MOESM3 [file 9629146]

## Criteria for success

1) Local health care service delivery problem is clearly stated

An effort is made to describe the local health-related challenges that the technology is intended to solve

2) Telemedicine is recognized as a benefit

A telemedical application is seen as a potential solution to the challenge (cf. Criterion 1)

3) Telemedicine is seen as a solution to medical and/or political issues

Equal access to health care is often a major concern, justifying the implementation of telemedicine

4) There is collaboration between promoters and users

Successful implementation depends on teamwork, involving the initiators of the technology as well as the managers, clinicians, and patients

5) Issues regarding organisational and technical arrangements are addressed

Successful implementations are often characterised by a sound anchoring in established organisations and technical structures, or by the establishment of new structures

6) The future operation of the service is considered

Plans for future use and for future financing are important to success
